# Supplementary material for: Exploring transdiagnostic stress and trauma-related symptoms across the world: a latent class analysis
Source: PubMed Central journal article supplement — Eur J Psychotraumatol. 2024 Feb 29;15(1):2318190. doi: 10.1080/20008066.2024.2318190 (PMC10906118; doi:10.1080/20008066.2024.2318190), 2024-02-29
Supplement: ZEPT_A_2318190_SM7419.pdf [file ZEPT_A_2318190_SM7419.pdf]

# Supplement

## Exploring transdiagnostic stress and trauma-related symptoms across the world: a latent class analysis

Stephanie Haering\*, Marike J. Kooistra\*, Christine Bourey, Ulziimaa Chimed-Ochir, Nikola Doubková, Chris M. Hoeboer, Emma C. Lathan, Hope Christie\*\*, Anke de Haan\*\*

\* Shared first authorship

\*\* Shared last authorship

**Corresponding author:** Stephanie Haering, email address: [s.haering@fu-berlin.de](mailto:s.haering@fu-berlin.de)

|                                                                                            |    |
|--------------------------------------------------------------------------------------------|----|
| <b>Supplement</b> .....                                                                    | 1  |
| <b>Supplement 1: Gender-disaggregated information</b> .....                                | 2  |
| <b>Supplement 2: Trauma types and stress and trauma-related symptoms across regions</b> .. | 8  |
| <b>Cross-regional differences in event characteristics</b> .....                           | 9  |
| <b>Events involving sexual violence</b> .....                                              | 9  |
| <b>Events involving multiple experiences of the event</b> .....                            | 10 |
| <b>Events involving life threat</b> .....                                                  | 11 |
| <b>Cross-regional differences in transdiagnostic symptom distributions</b> .....           | 12 |
| <b>Sexual violence-related symptoms</b> .....                                              | 12 |
| <b>Symptoms related to multiple experiences of the event</b> .....                         | 13 |
| <b>Life threat-related symptoms</b> .....                                                  | 14 |
| <b>Supplement 3: Key class characteristics</b> .....                                       | 15 |

### **Supplement 1: Gender-disaggregated information**

Research indicates that women and gender minorities are at an increased risk for a broad range of trauma-related mental disorders (Borgogna et al., 2022; Gavranidou & Rosner, 2003; Haering et al., 2022; Leach et al., 2008; Tolin & Foa, 2006; Van de Velde et al., 2010). The results of our multinomial regression analysis were in line with these findings, as women and gender nonbinary participants were more likely to belong to the high versus low and moderate symptom class (see manuscript for detailed analyses and results). One potential reason for this might be that individuals differ in the specific types of potentially traumatic events (PTEs) they experience. For instance, women and gender queer individuals are more likely than men to experience high-impact events such as sexual violence or physical assault (Brewerton et al., 2022; Kessler et al., 1995; Newcomb et al., 2020), which have been found to be associated with a higher probability of developing posttraumatic stress disorder (PTSD) (Breslau et al., 1999). Accordingly, we conducted supplementary analyses on trauma type by gender in our sample.

Due to the multiple answer options of the GPS trauma item, there were no mutually exclusive and distinct trauma categories in the data set, which prevented an overall analysis of trauma type\*gender. To accommodate this difficulty, we tested whether women and men differed by self-experienced sexual violence (versus all other trauma types) and self-experienced physical violence (versus all other trauma types).

Differences in trauma type by gender were investigated using  $\chi^2$ -tests.

Bonferroni-adjusted  $p$ -values indicated a significance threshold of  $p = .05/3 = .016$  for pairwise comparisons.

Analyses showed that there was differential risk for both sexual violence ( $\chi^2(2, N = 8675) = 290.33, p < .001$ ) and physical violence ( $\chi^2(2, N = 8675) = 81.04, p < .001$ ) based on gender. Women were more often exposed to sexual violence ( $\chi^2(1, N = 8583) = 262.71, p < .001$ ) and physical violence than men ( $\chi^2(1, N = 8583) = 59.47, p < .001$ ). Compared to men, nonbinary participants were more often exposed to sexual violence ( $\chi^2(1, N = 2169) = 157.79, p < .001$ ) and physical violence ( $\chi^2(1, N = 2169) = 42.56, p < .001$ ). Also, nonbinary participants were more likely to experience sexual violence ( $\chi^2(1, N = 6598) = 16.04, p < .001$ ) and physical violence than women ( $\chi^2(1, N = 6598) = 15.37, p < .001$ ). Of note, cell frequencies for nonbinary participants were much smaller than for women and men, as shown in Supplementary Table S1.1 below.

**Table S1.1.** Demographics, trauma characteristics, and risk factors by gender

|                                                                         | <b>Men<br/>(n = 2077)</b> | <b>Women<br/>(n = 6506)</b> | <b>Nonbinary<br/>(n = 92)</b> |
|-------------------------------------------------------------------------|---------------------------|-----------------------------|-------------------------------|
| <b><i>Demographics</i></b>                                              |                           |                             |                               |
| <b>Age</b>                                                              |                           |                             |                               |
| Mean (SD)                                                               | 40.0 (14.8)               | 37.6 (13.8)                 | 29.7 (13.1)                   |
| <b>UN Region</b>                                                        |                           |                             |                               |
| African States                                                          | 54 (2.6%)                 | 239 (3.7%)                  | 0 (0%)                        |
| Asia-Pacific States                                                     | 483 (23.3%)               | 1241 (19.1%)                | 9 (9.8%)                      |
| Eastern European States                                                 | 436 (21.0%)               | 1122 (17.2%)                | 17 (18.5%)                    |
| Latin American and<br>Caribbean States                                  | 234 (11.3%)               | 722 (11.1%)                 | 0 (0%)                        |
| Western European and<br>Other States                                    | 650 (31.3%)               | 1960 (30.1%)                | 21 (22.8%)                    |
| North America                                                           | 220 (10.6%)               | 1222 (18.8%)                | 45 (48.9%)                    |
| <b><i>Trauma characteristics</i></b>                                    |                           |                             |                               |
| <b>Index event happened</b>                                             |                           |                             |                               |
| In the past year                                                        | 1956 (46.5%)              | 2774 (42.6%)                | 27 (29.3%)                    |
| More than a year ago                                                    | 1112 (53.5%)              | 3732 (57.4%)                | 65 (70.7%)                    |
| <b>Multiple experiences of<br/>index event</b>                          |                           |                             |                               |
| Yes                                                                     | 619 (29.8%)               | 2614 (40.2%)                | 56 (60.9%)                    |
| No                                                                      | 1458 (70.2%)              | 3892 (59.8%)                | 36 (39.1%)                    |
| <b>Index event includes self-<br/>experienced sexual<br/>violence</b>   |                           |                             |                               |
| Yes                                                                     | 96 (4.6%)                 | 1277 (19.6%)                | 34 (37.0%)                    |
| No                                                                      | 1981 (95.4%)              | 5229 (80.4%)                | 58 (63.0%)                    |
| <b>Index event includes self-<br/>experienced physical<br/>violence</b> |                           |                             |                               |
| Yes                                                                     | 287 (13.8%)               | 1404 (21.6%)                | 36 (39.1%)                    |
| No                                                                      | 1790 (86.2%)              | 5102 (78.4%)                | 56 (60.9%)                    |
| <b><i>Risk factors</i></b>                                              |                           |                             |                               |
| <b>Other stressful events</b>                                           |                           |                             |                               |
| Yes                                                                     | 1143 (55.0%)              | 4334 (66.6%)                | 67 (72.8%)                    |
| No                                                                      | 934 (45.0%)               | 2172 (33.4%)                | 25 (27.2%)                    |
| <b>Lack of social support</b>                                           |                           |                             |                               |
| Yes                                                                     | 701 (33.8%)               | 3000 (46.1%)                | 48 (52.2%)                    |
| No                                                                      | 1376 (66.2%)              | 3506 (53.9%)                | 44 (47.8%)                    |

|                                  | <b>Men<br/>(n = 2077)</b> | <b>Women<br/>(n = 6506)</b> | <b>Nonbinary<br/>(n = 92)</b> |
|----------------------------------|---------------------------|-----------------------------|-------------------------------|
| <b>Childhood trauma</b>          |                           |                             |                               |
| Yes                              | 863 (41.6%)               | 3795 (58.3%)                | 70 (76.1%)                    |
| No                               | 1214 (58.4%)              | 2711 (41.7%)                | 22 (23.9%)                    |
| <b>History of mental illness</b> |                           |                             |                               |
| Yes                              | 497 (23.9%)               | 2711 (41.7%)                | 74 (80.4%)                    |
| No                               | 1580 (76.1%)              | 3795 (58.3%)                | 18 (19.6%)                    |
| <b>Lack of resilience</b>        |                           |                             |                               |
| Yes                              | 420 (20.2%)               | 1369 (21.0%)                | 35 (38.0%)                    |
| No                               | 1657 (79.8%)              | 5137 (79.0%)                | 57 (62.0%)                    |

## References

- Borgogna, N., Lathan, E.C., & Aita, S. (2022). Sexual and gender minority victimization: Differences in emotional, physical, and sexual assault across asexual, bisexual, demisexual, heterosexual, gay, lesbian, pansexual, queer, questioning, and gender non-conforming college students. *Journal of Interpersonal Violence*. <https://doi.org/10.1177/08862605221124253>
- Breslau, N., Chilcoat, H. D., Kessler, R. C., Peterson, E. L., & Lucia, V. C. (1999). Vulnerability to assaultive violence: Further specification of the sex difference in post-traumatic stress disorder. *Psychological Medicine*, 29(4), 813–821. <https://doi.org/10.1017/S0033291799008612>
- Brewerton, T. D., Suro, G., Gavidia, I., & Perlman, M. M. (2022). Sexual and gender minority individuals report higher rates of lifetime traumas and current PTSD than cisgender heterosexual individuals admitted to residential eating disorder treatment. *Eating and Weight Disorders - Studies on Anorexia, Bulimia and Obesity*, 27(2), 813–820. <https://doi.org/10.1007/s40519-021-01222-4>

LCA of global stress- and trauma-related symptoms

Gavranidou, M., & Rosner, R. (2003). The weaker sex? Gender and post-traumatic stress disorder. *Depression and Anxiety, 17*(3), 3.

<https://doi.org/10.1002/da.10103>

Haering, S., Schulze, L., Geiling, A., Meyer, C., Klusmann, H., Schumacher, S., Knaevelsrud, C., & Engel, S. (2022). *Higher risk – less data: Challenges to sex and gender considerations in trauma research* [Preprint]. PsyArXiv.

<https://doi.org/10.31234/osf.io/ad35g>

Kessler, R. C., Sonnega, A., Bromet, E., Hughes, M., & Nelson, C. (1995).

Posttraumatic Stress Disorder in the National Comorbidity Survey. *Arch General Psychiatry, 52*, 1048–1060.

<https://doi.org/10.1001/archpsyc.1995.03950240066012>

Leach, L. S., Christensen, H., Mackinnon, A. J., Windsor, T. D., & Butterworth, P. (2008). Gender differences in depression and anxiety across the adult lifespan:

The role of psychosocial mediators. *Social Psychiatry and Psychiatric Epidemiology, 43*(12), 12. <https://doi.org/10.1007/s00127-008-0388-z>

Newcomb, M. E., Hill, R., Buehler, K., Ryan, D. T., Whitton, S. W., & Mustanski, B.

(2020). High Burden of Mental Health Problems, Substance Use, Violence, and Related Psychosocial Factors in Transgender, Non-Binary, and Gender Diverse Youth and Young Adults. *Archives of Sexual Behavior, 49*(2), 645–659.

<https://doi.org/10.1007/s10508-019-01533-9>

Tolin, D. F., & Foa, E. B. (2006). Sex differences in trauma and posttraumatic stress disorder: A quantitative review of 25 years of research. *Psychological Bulletin, 132*(6), 6.

<https://doi.org/10.1037/0033-2909.132.6.959>

LCA of global stress- and trauma-related symptoms

Van de Velde, S., Bracke, P., & Levecque, K. (2010). Gender differences in depression in 23 European countries. Cross-national variation in the gender gap in depression. *Social Science & Medicine*, 71(2), 2.  
<https://doi.org/10.1016/j.socscimed.2010.03.035>

## **Supplement 2: Trauma types and stress and trauma-related symptoms across regions**

Due to the mutually non-distinct event assessment in the GPS (multiple answers are possible to describe the index event, e.g., participants can indicate that their index event involved both sexual violence and physical violence) a general analysis of trauma type distribution by region was not possible. We therefore decided to focus on three complementing event characteristics to compare across regions: 1) whether the index event involved sexual violence; 2) whether the index event involved multiple experiences of the event; and 3) whether the index event involved life-threat.

In a first step, for each of these three categories, we compared the relative share of events fulfilling the respective criterion across regions. In a second step, we compared transdiagnostic symptom distributions given the same event type across regions.

Bonferroni-corrected post-hoc tests were used to compare all possible pairs of regions (i.e.,  $k = 15$  comparisons). P values for multiple comparisons were multiplied by 15 to account for the alpha-level adjustment.



## Cross-regional differences in event characteristics

### Events involving sexual violence

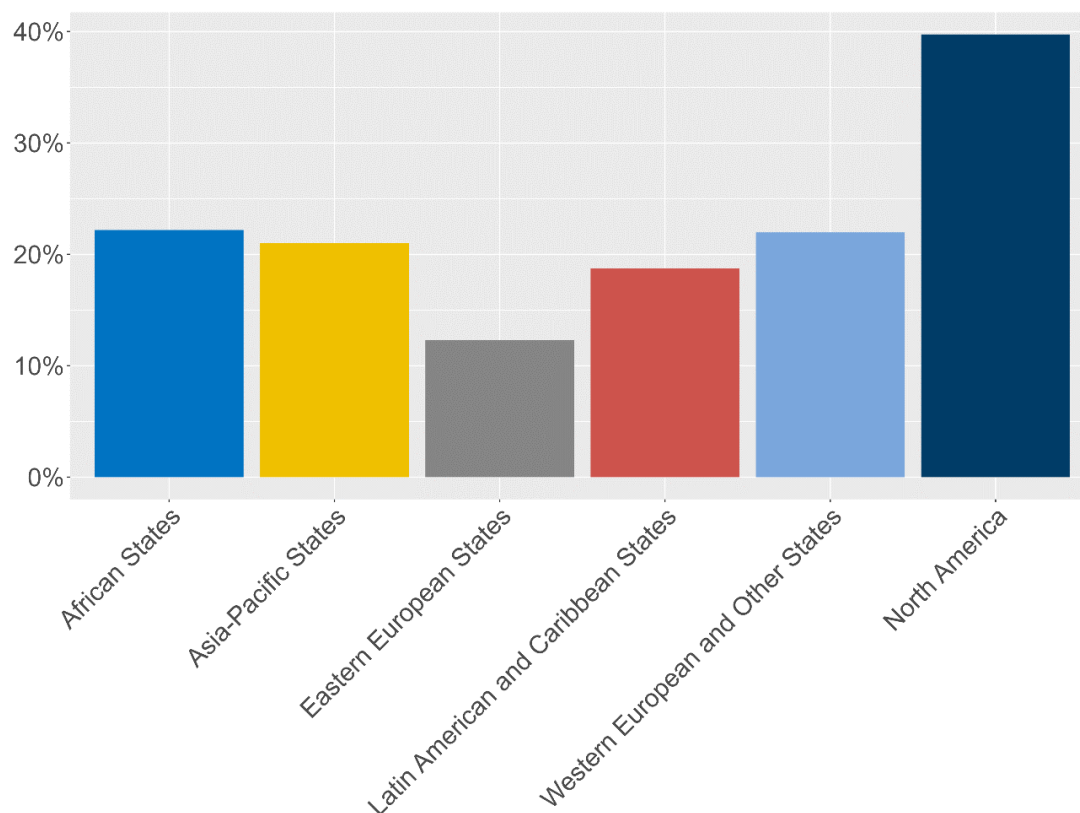

**Figure S2.1.** Regional shares of events that were reported as involving sexual violence

**Table S2.1.** Percentage point differences in shares of events involving sexual violence

|                                                  | Asia-Pacific States (21%) | Eastern European States (12%) | Latin American and Caribbean States (19%) | Western European and Other States (22%) | North America (40%) |
|--------------------------------------------------|---------------------------|-------------------------------|-------------------------------------------|-----------------------------------------|---------------------|
| <b>African States (22%)</b>                      | 1%-point                  | <b>10%-points</b>             | 3%-points                                 | 0%-points                               | <b>18%-points</b>   |
| <b>Asia-Pacific States (21%)</b>                 |                           | <b>9%-points</b>              | 2%-points                                 | 1%-point                                | <b>19%-points</b>   |
| <b>Eastern European States (12%)</b>             |                           |                               | <b>7%-points</b>                          | <b>10%-points</b>                       | <b>28%-points</b>   |
| <b>Latin American and Caribbean States (19%)</b> |                           |                               |                                           | 3%-points                               | <b>21%-points</b>   |
| <b>Western European and Other States (22%)</b>   |                           |                               |                                           |                                         | <b>18%-points</b>   |

*Note.* Bonferroni-adjusted multiple comparisons were used to compare event types among regions. Bolded values indicate a statistically significant difference (Bonferroni-adjusted  $p < .05$ ).

### Events involving multiple experiences of the event

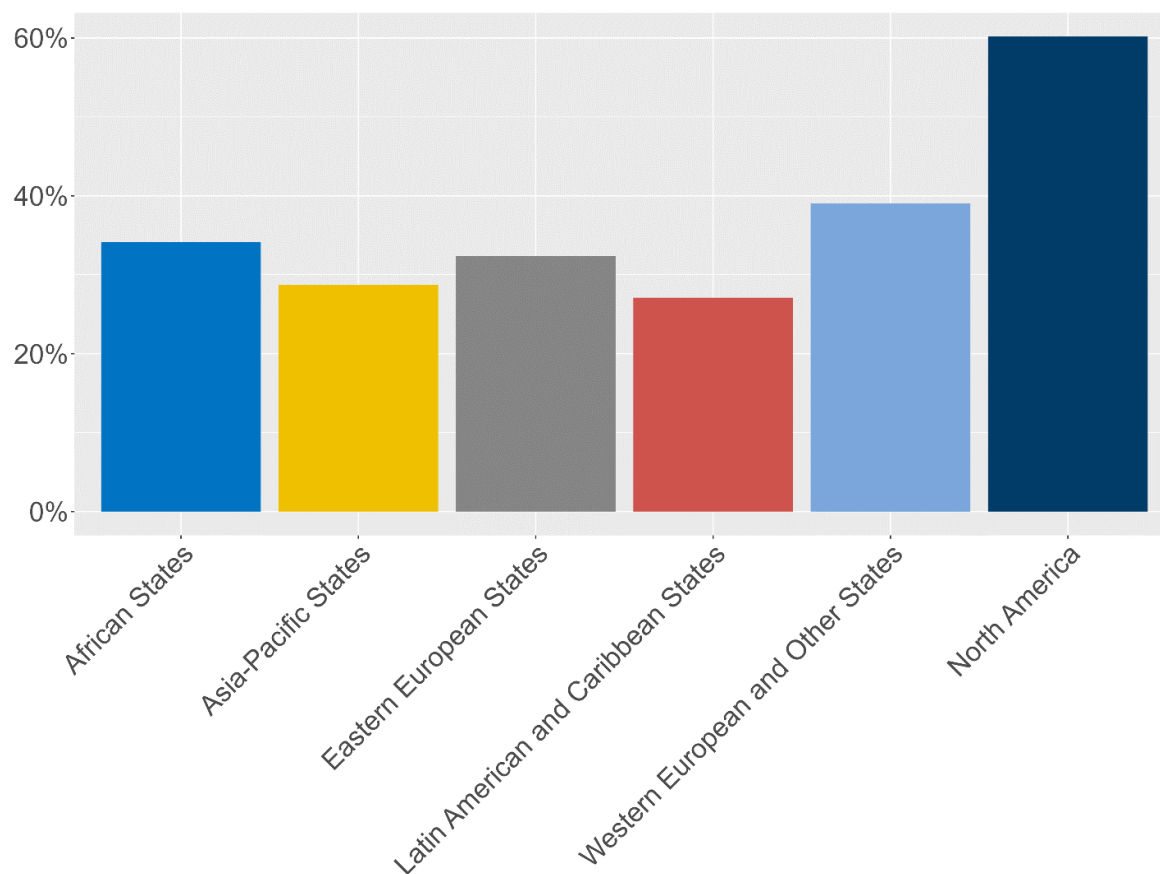

**Figure S2.2.** Regional shares of events that were reported as involving multiple experiences of the event

**Table S2.2.** Percentage point differences in shares of events involving multiple experiences of the event

|                                                  | <b>Asia-Pacific States (29%)</b> | <b>Eastern European States (32%)</b> | <b>Latin American and Caribbean States (27%)</b> | <b>Western European and Other States (39%)</b> | <b>North America (60%)</b> |
|--------------------------------------------------|----------------------------------|--------------------------------------|--------------------------------------------------|------------------------------------------------|----------------------------|
| <b>African States (34%)</b>                      | 5%-points                        | 2%-points                            | 7%-points                                        | 5%-points                                      | <b>26%-points</b>          |
| <b>Asia-Pacific States (29%)</b>                 |                                  | 3%-points                            | 2%-points                                        | <b>10%-points</b>                              | <b>31%-points</b>          |
| <b>Eastern European States (32%)</b>             |                                  |                                      | 5%-points                                        | <b>7%-points</b>                               | <b>28%-points</b>          |
| <b>Latin American and Caribbean States (27%)</b> |                                  |                                      |                                                  | <b>12%-points</b>                              | <b>33%-points</b>          |
| <b>Western European and Other States (39%)</b>   |                                  |                                      |                                                  |                                                | <b>21%-points</b>          |

*Note.* Bonferroni-adjusted multiple comparisons were used to compare event types among regions. Bolded values indicate a statistically significant difference (Bonferroni-adjusted  $p < .05$ ).

### Events involving life threat

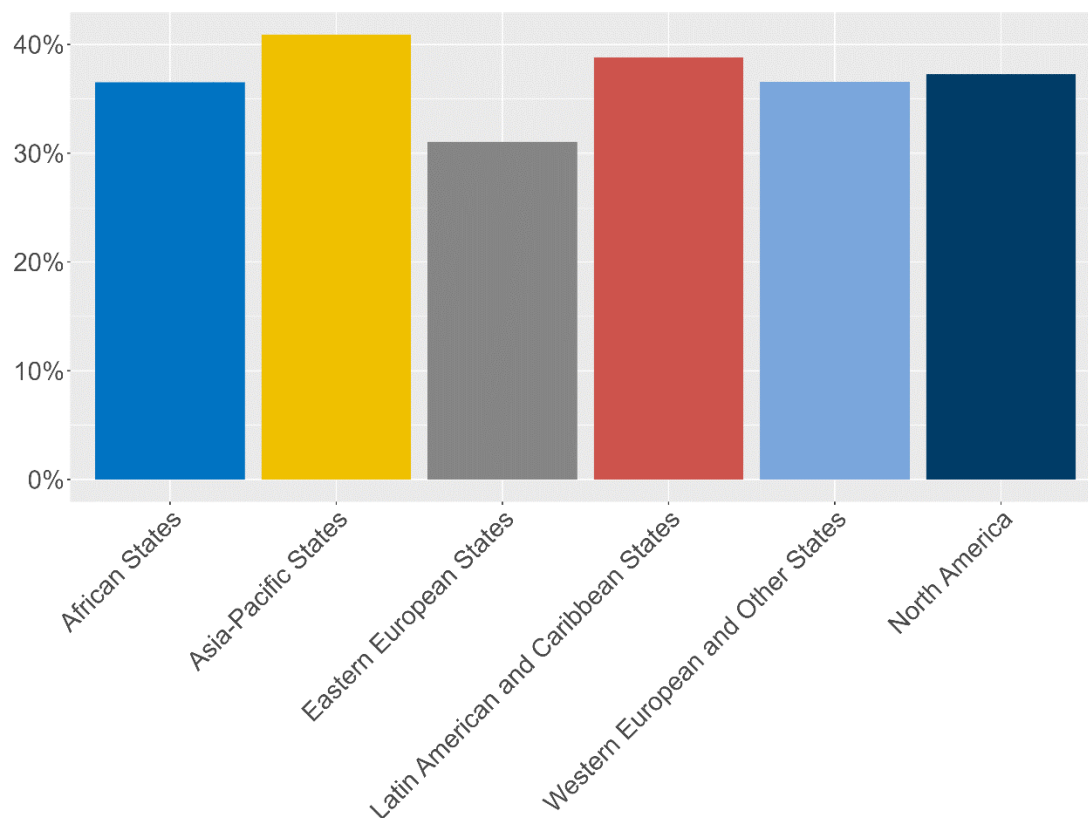

**Figure S2.3.** Regional shares of events that were reported as involving life threat

**Table S2.3.** Percentage point differences in shares of events involving life threat

|                                                  | Asia-Pacific States (41%) | Eastern European States (31%) | Latin American and Caribbean States (39%) | Western European and Other States (37%) | North America (37%) |
|--------------------------------------------------|---------------------------|-------------------------------|-------------------------------------------|-----------------------------------------|---------------------|
| <b>African States (37%)</b>                      | 4%-points                 | <b>6%-points</b>              | 2%-points                                 | 0%-points                               | 0%-points           |
| <b>Asia-Pacific States (41%)</b>                 |                           | <b>10%-points</b>             | 2%-points                                 | 4%-points                               | 4%-points           |
| <b>Eastern European States (31%)</b>             |                           |                               | <b>8%-points</b>                          | <b>6%-points</b>                        | <b>6%-points</b>    |
| <b>Latin American and Caribbean States (39%)</b> |                           |                               |                                           | 2%-points                               | 2%-points           |
| <b>Western European and Other States (37%)</b>   |                           |                               |                                           |                                         | 0%-points           |

*Note.* Bonferroni-adjusted multiple comparisons were used to compare event types among regions. Bolded values indicate a statistically significant difference (Bonferroni-adjusted  $p < .05$ ).

### Cross-regional differences in transdiagnostic symptom distributions

#### Sexual violence-related symptoms

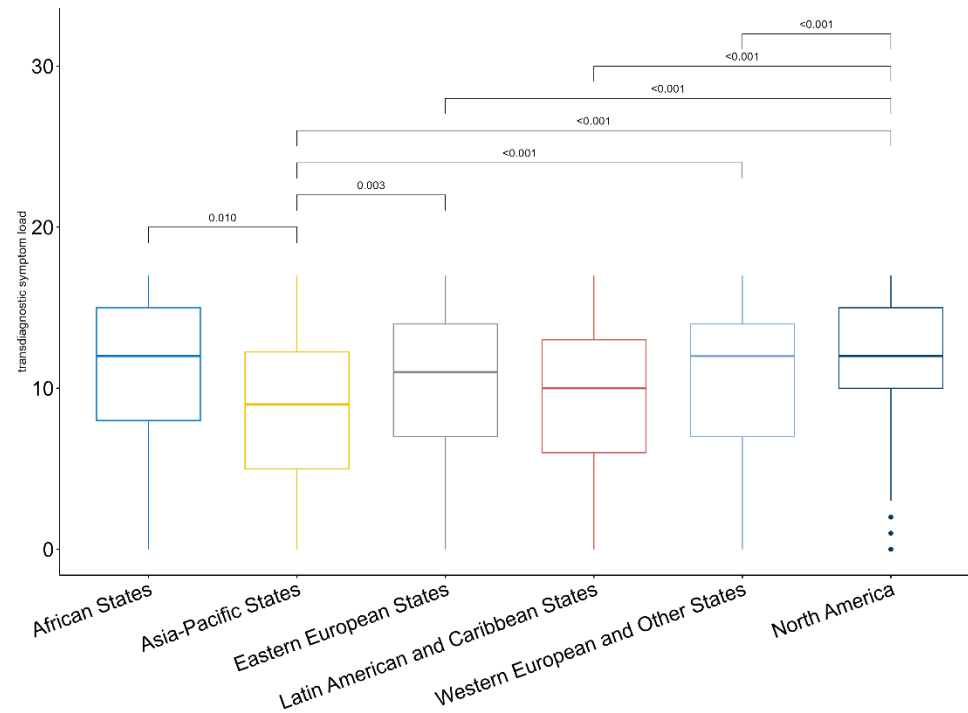

**Figure S2.4.** Regional differences in sexual violence-related symptoms

*Note.* Bonferroni-adjusted multiple comparisons were used to compare symptom distributions among regions. Highlighted contrasts indicate a statistically significant difference (Bonferroni-adjusted  $p < .05$ ).

**Table S2.4.** Regional differences in sexual violence-related symptoms

| contrast                                                | Cohen's <i>d</i> | Lower CI | Upper CI |
|---------------------------------------------------------|------------------|----------|----------|
| African States - Asia-Pacific States                    | 0.49             | 0.22     | 0.75     |
| Asia-Pacific States - Eastern European States           | 0.34             | 0.52     | 0.17     |
| Asia-Pacific States - North America                     | 0.69             | 0.82     | 0.56     |
| Asia-Pacific States - Western European and Other States | 0.40             | 0.53     | 0.27     |
| Eastern European States - North America                 | 0.35             | 0.51     | 0.18     |
| Latin American and Caribbean States - North America     | 0.47             | 0.64     | 0.30     |
| Western European and Other States - North America       | 0.29             | 0.41     | 0.18     |

*Note.* Effect size differences and 95% Confidence intervals for Bonferroni-corrected statistically significant regional comparisons are depicted

Symptoms related to multiple experiences of the event

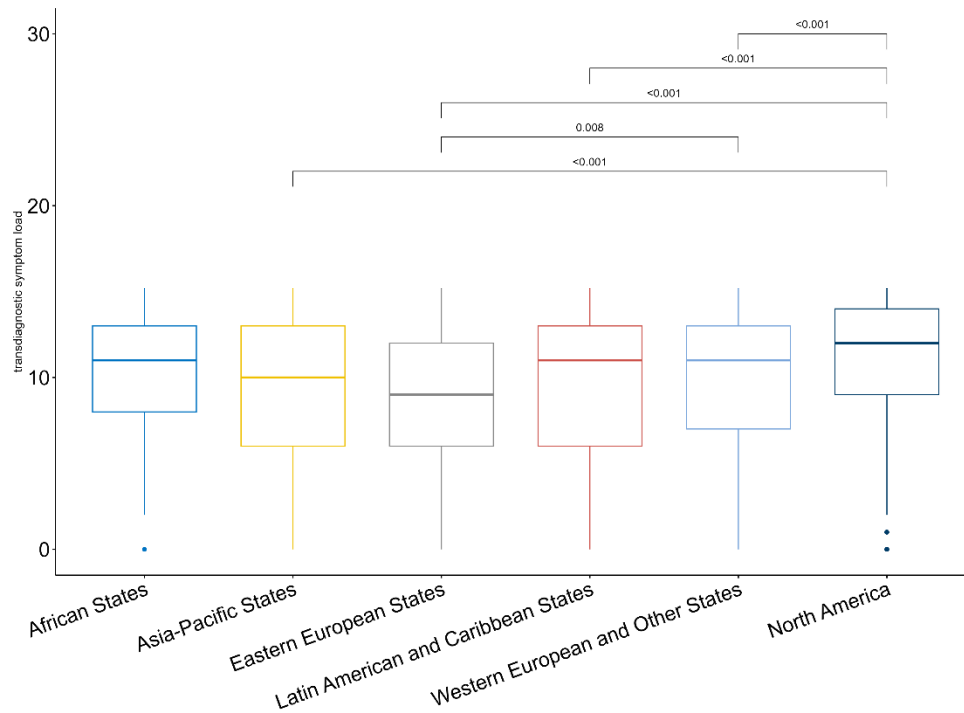

**Table S2.5.** Regional differences in symptoms related to multiple experiences of the event

| contrast                                                    | Cohen's <i>d</i> | Lower CI | Upper CI |
|-------------------------------------------------------------|------------------|----------|----------|
| Asia-Pacific States - North America                         | 0.47             | 0.58     | 0.36     |
| Eastern European States - North America                     | 0.52             | 0.63     | 0.41     |
| Eastern European States - Western European and Other States | 0.19             | 0.30     | 0.08     |
| Latin American and Caribbean States - North America         | 0.38             | 0.52     | 0.24     |
| Western European and Other States - North America           | 0.33             | 0.42     | 0.24     |

*Note.* Effect size differences and 95% Confidence intervals for Bonferroni-corrected statistically significant regional comparisons are depicted

**Figure S2.5.** Regional differences in symptoms related to multiple experiences of the event  
*Note.* Bonferroni-adjusted multiple comparisons were used to compare symptom distributions among regions. Highlighted contrasts indicate a statistically significant difference (Bonferroni-adjusted  $p < .05$ ).

**Life threat-related symptoms**

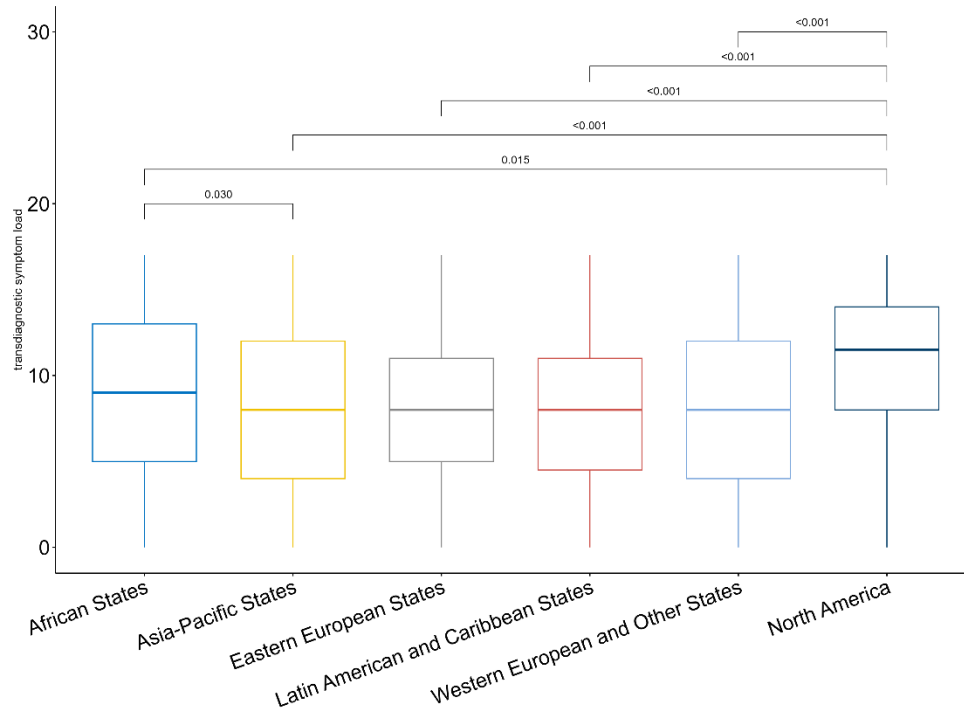

**Figure S2.6.** Regional differences in life threat-related symptoms  
*Note.* Bonferroni-adjusted multiple comparisons were used to compare symptom distributions among regions. Highlighted contrasts indicate a statistically significant difference (Bonferroni-adjusted  $p < .05$ ).

**Table S2. 6.** Regional differences in life threat-related symptoms

| contrast                                            | Cohen's <i>d</i> | Lower CI | Upper CI |
|-----------------------------------------------------|------------------|----------|----------|
| African States - Asia-Pacific States                | 0.34             | 0.13     | 0.54     |
| African States - North America                      | 0.35             | 0.56     | 0.14     |
| Asia-Pacific States - North America                 | 0.69             | 0.80     | 0.58     |
| Eastern European States - North America             | 0.61             | 0.73     | 0.48     |
| Latin American and Caribbean States - North America | 0.62             | 0.76     | 0.49     |
| Western European and Other States - North America   | 0.64             | 0.75     | 0.53     |

*Note.* Effect size differences and 95% Confidence intervals for Bonferroni-corrected statistically significant regional comparisons are depicted

**Supplement 3: Key class characteristics****Table S3.1.** Demographics, trauma characteristics, and risk factors of the symptom classes

|                                            | Overall<br>(N=8675) |      | High symptoms<br>(n=2834) |      | Moderate<br>symptoms<br>(n=3739) |      | Low symptoms<br>(n=2102) |      | p-value |
|--------------------------------------------|---------------------|------|---------------------------|------|----------------------------------|------|--------------------------|------|---------|
|                                            | n                   | %    | n                         | %    | n                                | %    | n                        | %    |         |
| <b>Age</b>                                 |                     |      |                           |      |                                  |      |                          |      |         |
| Mean                                       |                     | 38.1 |                           | 35.6 |                                  | 38.8 |                          | 40.2 | <.001   |
| SD                                         |                     | 14.1 |                           | 13.1 |                                  | 14.2 |                          | 14.8 |         |
| <b>Gender</b>                              |                     |      |                           |      |                                  |      |                          |      |         |
| Men                                        | 2077                | 23.9 | 456                       | 16.1 | 853                              | 22.8 | 768                      | 36.5 | <.001   |
| Women                                      | 6506                | 75.0 | 2317                      | 81.8 | 2863                             | 76.6 | 1326                     | 63.1 |         |
| Nonbinary                                  | 92                  | 1.1  | 61                        | 2.2  | 23                               | 0.6  | 8                        | 0.4  |         |
| <b>UN Region</b>                           |                     |      |                           |      |                                  |      |                          |      |         |
| African States                             | 293                 | 3.4  | 116                       | 4.1  | 118                              | 3.2  | 59                       | 2.8  | <.001   |
| Asia-Pacific States                        | 1733                | 20.0 | 471                       | 16.6 | 771                              | 20.6 | 491                      | 23.4 |         |
| Eastern European States                    | 1575                | 18.2 | 413                       | 14.6 | 708                              | 18.9 | 454                      | 21.6 |         |
| Latin American and Caribbean States        | 956                 | 11.0 | 280                       | 9.9  | 470                              | 12.6 | 206                      | 9.8  |         |
| Western European and Other States          | 2631                | 30.3 | 797                       | 28.1 | 1097                             | 29.3 | 737                      | 35.1 |         |
| North America                              | 1487                | 17.1 | 757                       | 26.7 | 575                              | 15.4 | 155                      | 7.4  |         |
| <b>Index event happened</b>                |                     |      |                           |      |                                  |      |                          |      |         |
| In the past year                           | 3766                | 43.3 | 1087                      | 38.4 | 1792                             | 47.9 | 887                      | 42.2 | <.001   |
| More than a year ago                       | 4909                | 56.6 | 1747                      | 61.6 | 1947                             | 52.1 | 1215                     | 57.8 |         |
| <b>Multiple experiences of index event</b> |                     |      |                           |      |                                  |      |                          |      |         |
| Yes                                        | 3289                | 37.9 | 1683                      | 59.4 | 1262                             | 33.8 | 344                      | 16.4 | <.001   |
| No                                         | 5386                | 62.1 | 1151                      | 40.6 | 2477                             | 66.2 | 1758                     | 83.6 |         |

LCA of global stress- and trauma-related responses

|                                  | <b>Overall<br/>(N=8675)</b> |      | <b>High symptoms<br/>(n=2834)</b> |      | <b>Moderate<br/>symptoms<br/>(n=3739)</b> |      | <b>Low symptoms<br/>(n=2102)</b> |      | <b>p-value</b> |
|----------------------------------|-----------------------------|------|-----------------------------------|------|-------------------------------------------|------|----------------------------------|------|----------------|
| <b>PTSD A-criterion met</b>      |                             |      |                                   |      |                                           |      |                                  |      |                |
| Yes                              | 6201                        | 71.5 | 2232                              | 78.8 | 2600                                      | 69.5 | 1369                             | 65.1 | <.001          |
| No                               | 2474                        | 28.5 | 602                               | 21.2 | 1139                                      | 30.5 | 733                              | 34.9 |                |
| <b>Other stressful events</b>    |                             |      |                                   |      |                                           |      |                                  |      |                |
| Yes                              | 5544                        | 63.9 | 2414                              | 85.2 | 2471                                      | 66.1 | 659                              | 31.4 | <.001          |
| No                               | 3131                        | 36.1 | 420                               | 14.8 | 1268                                      | 33.9 | 1443                             | 68.6 |                |
| <b>Lack of social support</b>    |                             |      |                                   |      |                                           |      |                                  |      |                |
| Yes                              | 3749                        | 43.2 | 1896                              | 66.9 | 1521                                      | 40.7 | 332                              | 15.8 | <.001          |
| No                               | 4926                        | 56.8 | 938                               | 33.1 | 2218                                      | 59.3 | 1770                             | 84.2 |                |
| <b>Childhood trauma</b>          |                             |      |                                   |      |                                           |      |                                  |      |                |
| Yes                              | 4728                        | 54.5 | 2084                              | 73.5 | 1915                                      | 51.2 | 729                              | 34.7 | <.001          |
| No                               | 3947                        | 45.5 | 750                               | 26.5 | 1824                                      | 48.8 | 1373                             | 65.3 |                |
| <b>History of mental illness</b> |                             |      |                                   |      |                                           |      |                                  |      |                |
| Yes                              | 3282                        | 37.8 | 1729                              | 61.0 | 1207                                      | 32.3 | 346                              | 16.5 | <.001          |
| No                               | 5393                        | 62.2 | 1105                              | 39.0 | 2532                                      | 67.7 | 1756                             | 83.5 |                |
| <b>Lack of resilience</b>        |                             |      |                                   |      |                                           |      |                                  |      |                |
| Yes                              | 1824                        | 21.0 | 756                               | 26.7 | 667                                       | 17.8 | 401                              | 19.1 | <.001          |
| No                               | 6851                        | 79.0 | 2078                              | 73.3 | 3072                                      | 82.2 | 1701                             | 80.9 |                |
